# Supplementary material for: A comparison of the atmospheric response to the Weddell Sea Polynya in atmospheric general circulation models (AGCMs) of varying resolutions
Source: Copernicus journal article supplement (doi:10.5194/wcd-5-805-2024), 2024-06-06
Supplement: Supplementary file 1 [file wcd-5-805-2024-supplement.pdf]

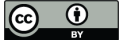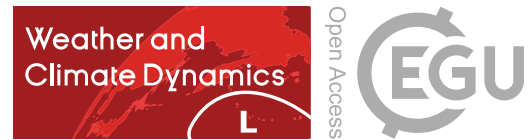

*Supplement of*

## **A comparison of the atmospheric response to the Weddell Sea Polynya in atmospheric general circulation models (AGCMs) of varying resolutions**

**Holly C. Ayres et al.**

*Correspondence to:* Holly C. Ayres ([holly.ayres@noc.ac.uk](mailto:holly.ayres@noc.ac.uk))

The copyright of individual parts of the supplement might differ from the article licence.

## Supplement

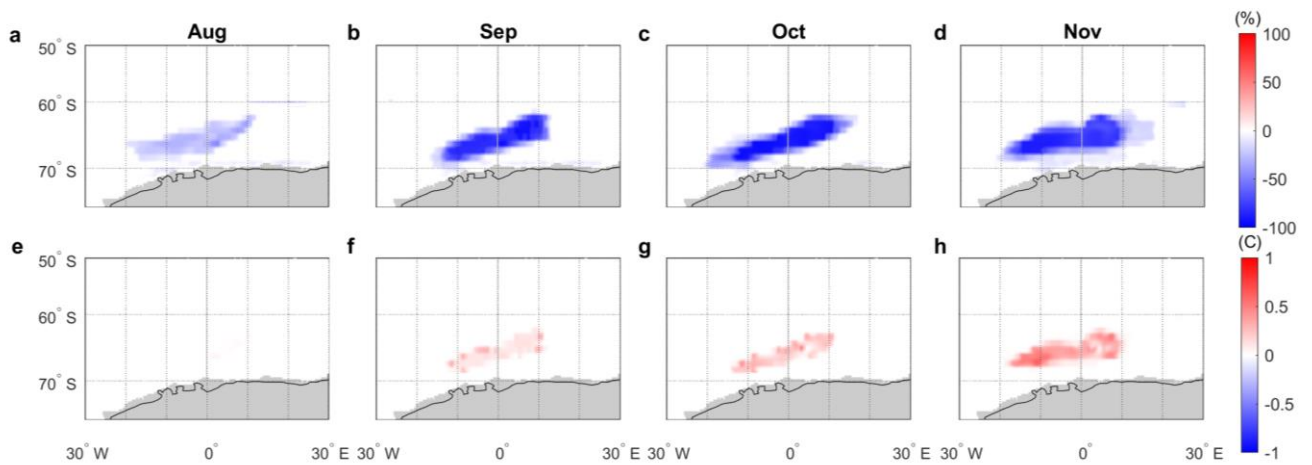

**Figure S1: Difference between Sea ice concentration boundary conditions with and without the polynya (ocean- atmosphere boundary layer forcing) for (a) August, (b) September, (c) October, (d) November. (e-h) as (a-d) but for sea surface temperature.**

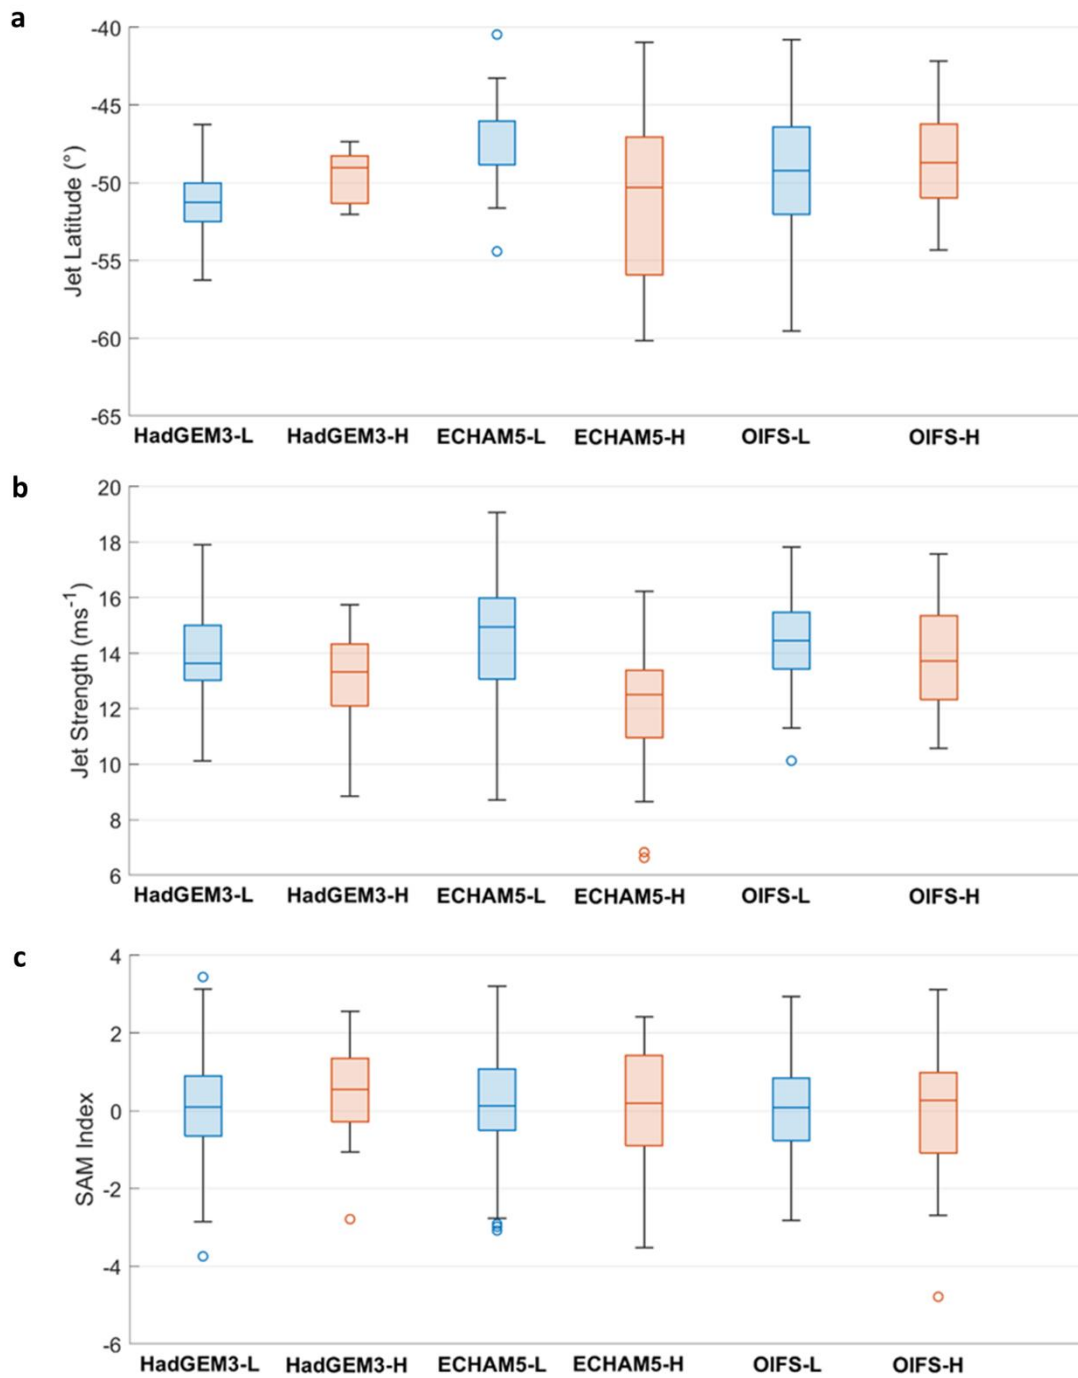

**Figure S2:** (a) Boxplots of jet latitude for the ensemble spread of each model at  $\pm 1$  standard deviation, with black lines denoting the 95th percentile. Blue/red denote the low/high resolution versions. Dots are anomalies outside of the 95th percentile. (b) as a for jet strength. (c) as a for the SAM Index.

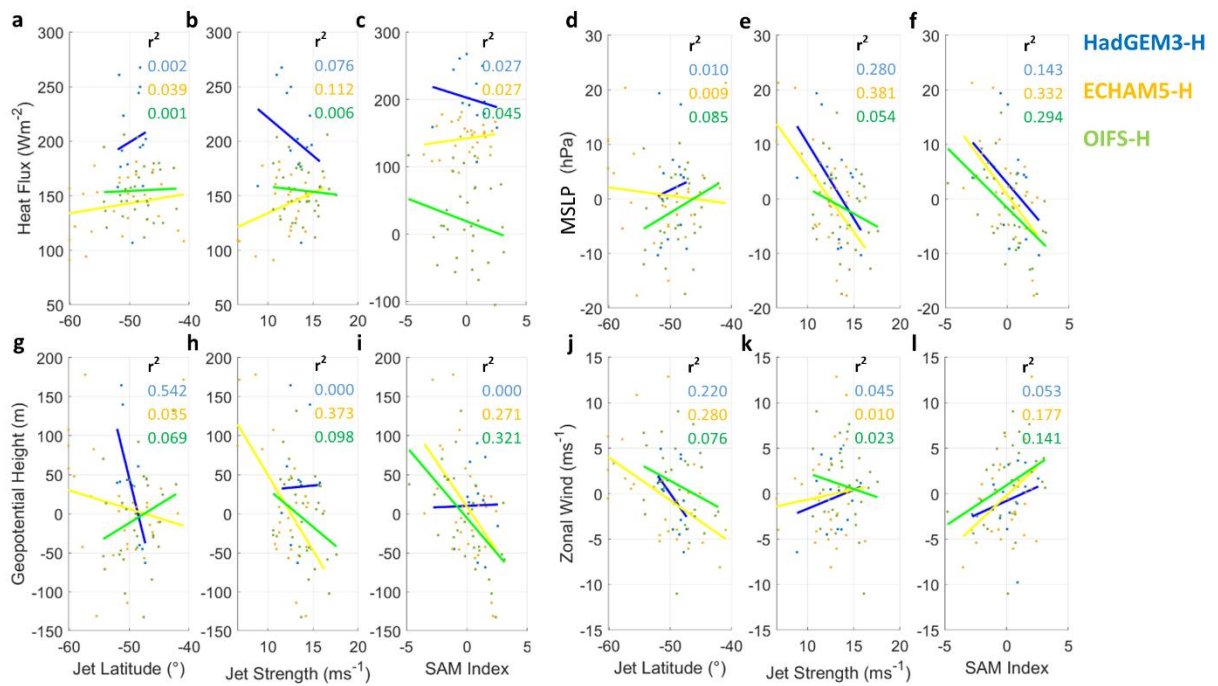

**Figure S3:** Heat flux response to the WSP (averaged over  $10^{\circ}\text{E} - 10^{\circ}\text{W}$ ,  $63^{\circ}\text{S} - 68^{\circ}\text{S}$ ; red box in Fig. 1) against jet latitude (a) jet strength (b), and SAM index (c) for the high-resolution versions of the models. Blue for HadGEM3-H, yellow for ECHAM5-H and green for OIFS-H. Each dot represents each ensemble member for September. (d-f) as (a-c) but for MSLP, (g-l) as (a-c) but for geopotential height at 850 hPa, and (j-l) as (a-c) but for zonal wind at 850 hPa.

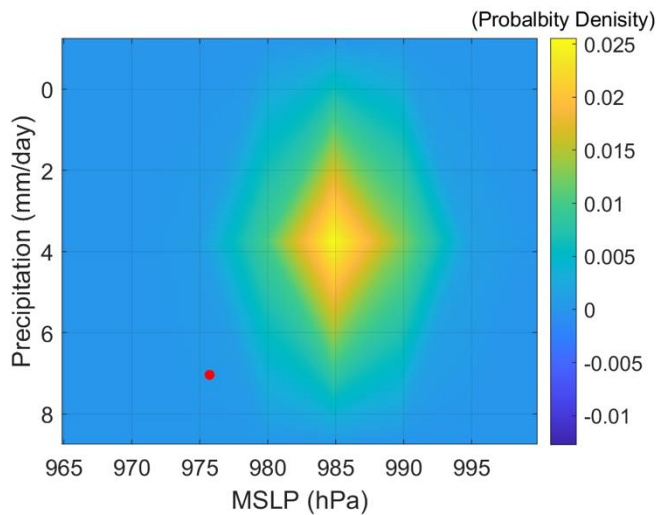

**Figure S4:** Probability density function of September ERA5 MSLP and total precipitation. The red dot is the polynya conditions for September 1974.
